# Supplementary material for: Hydrogen Sensing Properties of FET-Type Sensors with Pt-In2O3 at Room Temperature
Source: MDPI journal article supplement (doi:10.3390/chemosensors12030032), 2024-02-24
Supplement: s1 [file s1]

## Supplementary information for

### Hydrogen sensing properties of FET-type sensors with Pt-In<sub>2</sub>O<sub>3</sub> at room temperature

Meile Wu, Shixin Hu, Zhanyu Wu, Zebin Wang, Meng Li, Xi Liu, Xiaoshi Jin and Jong-Ho Lee

Correspondence: meilwu@sut.edu.cn

**Table S1.** Comparison of the sensing performance towards hydrogen gas of recently reported FET-type sensors. RT: room temperature.

| Sensor materials                                 | T(°C) | Deposition method         | Response/ Recovery times at H <sub>2</sub> % | Type         | Ref.      |
|--------------------------------------------------|-------|---------------------------|----------------------------------------------|--------------|-----------|
| Pt-In <sub>2</sub> O <sub>3</sub> sensitive gate | RT    | inkjet printing           | 90 s/680 s at 1000 ppm                       | FET          | This work |
| Monolayer MoS <sub>2</sub>                       | 200   | dry viscoelastic stamping | 7 min/67 min at 50%                          | FET          | [1]       |
| Pt sensitive gate                                | 240   | e-beam                    | 2.5 min/8.85 min at 250 ppm                  | HEMT         | [2]       |
| Pd-Ti/ZnO                                        | 100   | RF Sputtering             | 20 s/80 s at 4500 ppm                        | Schottky TFT | [3]       |
| Pt-Graphene sensitive gate                       | RT    | transfer & e-beam         | 9.8 min/0.4 min                              | HEMT         | [4]       |

#### References

1. Rezende, N.P.; Cadore, A.R.; Gadelha, A.C.; Pereira, C.L.; Ornelas, V.; Watanabe, K.; Taniguchi, T.; Ferlauto, A.S.; Malachias, A.; Campos, L.C.; et al. Probing the Electronic Properties of Monolayer MoS<sub>2</sub> via Interaction with Molecular Hydrogen. *Adv. Electron. Mater.* **2019**, *5*, 1800591.
2. Sokolovskij, R.; Zhang, J.; Zheng, H.; Li, W.; Jiang, Y.; Yang, G.; Yu, H.; Sarro, P.M.; Zhang, G. The Impact of Gate Recess on the H Detection Properties of Pt-AlGaIn/GaN HEMT Sensors. *IEEE Sens. J.* **2020**, *20*, 8947-8955.
3. Ghosh, S.; Rajan, L. Zinc Oxide Thin-Film Transistor with Catalytic Electrodes for Hydrogen Sensing at Room Temperature. *IEEE Trans. Nanotechnol.* **2021**, *20*, 303-310.
4. Ahn, J.; Kim, D.; Park, K.H.; Yoo, G.; Heo, J. Pt-Decorated Graphene Gate AlGaIn/GaN MIS-HEMT for Ultrahigh Sensitive Hydrogen Gas Detection. *IEEE Trans. Electron Devices* **2021**, *68*, 1255-1261.
